# Supplementary material
Source: bioRxiv or medRxiv preprint supplement (https://www.biorxiv.org/highwire/filestream/19771/field_highwire_adjunct_files/0/071704-1.pdf)

# Additional File 1: *S. pneumoniae* Phylogenetic Tree

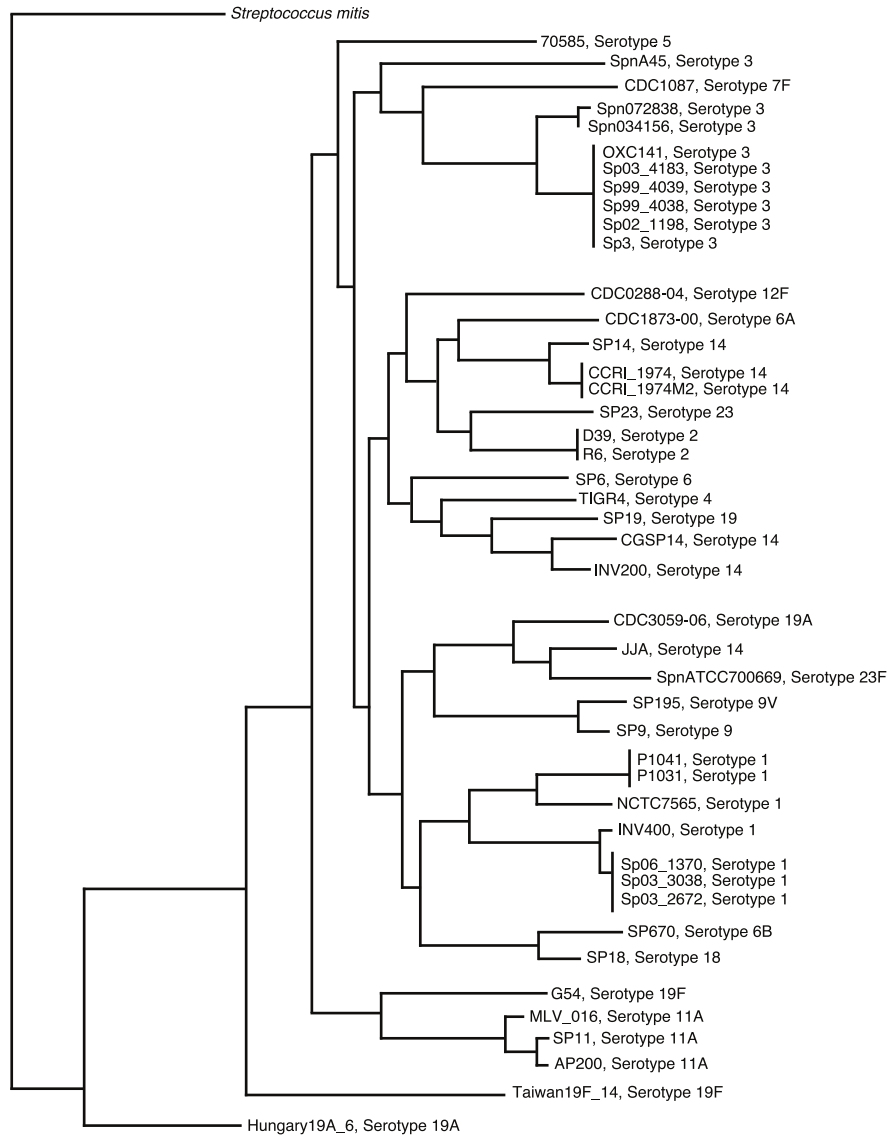

Supplement: Supplementary file [file 071704-1.pdf]
